# Supplementary material for: Tofacitinib and peficitinib inhibitors of Janus kinase for autoimmune disease treatment: a quantum biochemistry approach
Source: Royal Society of Chemistry journal article supplement (doi:10.1039/d3cp06332a), 2024-01-01
Supplement: d3cp06332a1.pdf [file d3cp06332a1.pdf]

**Supplementary Figure 1.** Interactions between tofacitinib and peficitib. (A) and (B) 2D Representation of hydrogen bonds between water molecules and tofacitinib or peficitinib, respectively. (C) and (D) 3D Representation of these interaction.

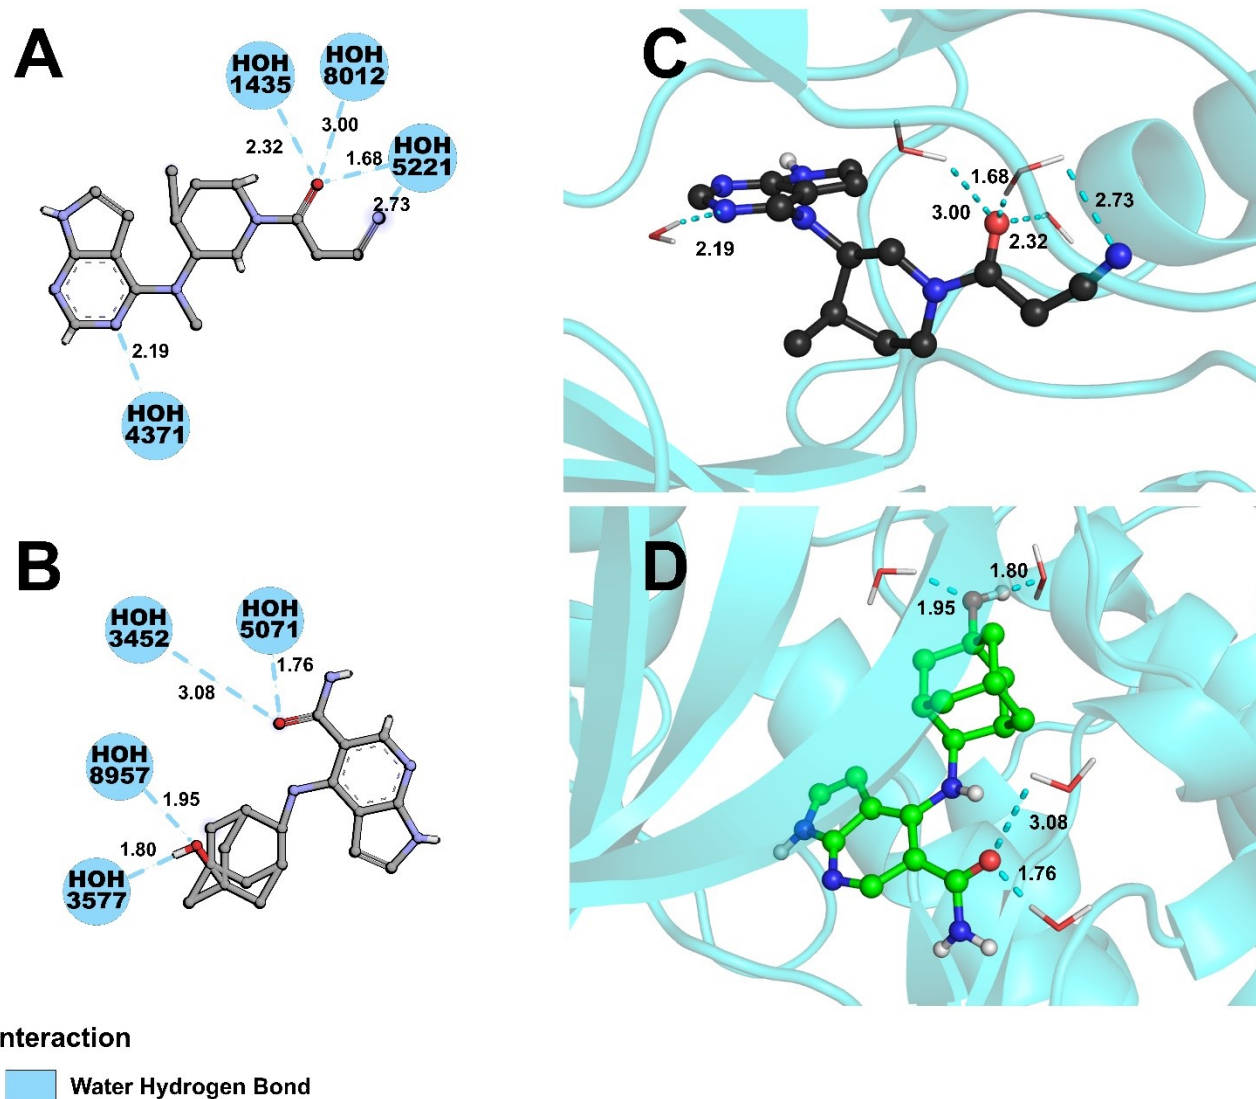

**Supplementary Figure 2.** JAK1 main residues involved in the interaction with tofacitinib and peficitinib at dielectric constant homogeneous based on MD's conformation resultant of CHARMM36 forcefield and TIP3P water. The graph provides the interaction energy between both ligands and JAK1. Tofacitinib and peficitinib are represented in black and lime green, respectively.

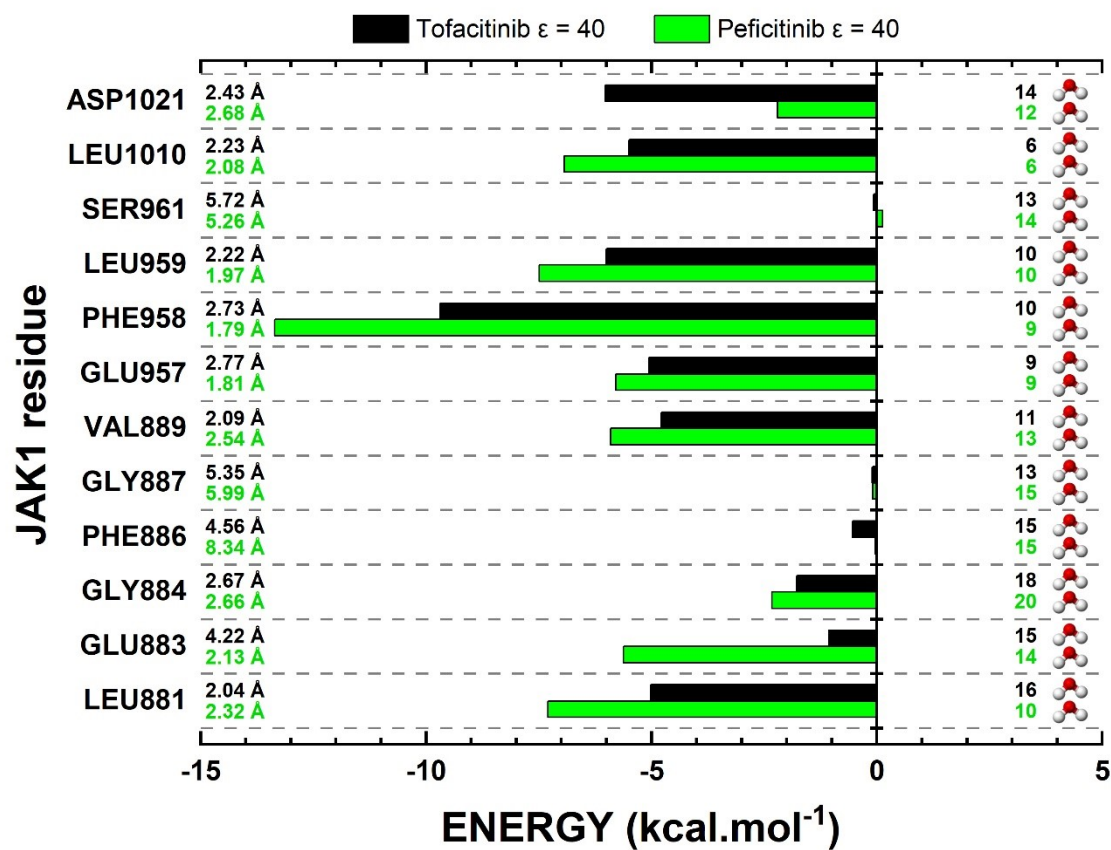

**Supplementary Figure 3.** Interactions between tofacitinib and peficitib with JAK1 residues resulting from molecular dynamics simulation using the TIP3P water model. (A) and (B) show 2D interactions with tofacitinib and peficitinib, respectively. (C) and (D) show 3D interactions with tofacitinib and peficitinib, respectively. In 2D representations, the light green discs represent Van Der Waals interactions, the pink discs represent alkyl interactions (Hydrophobic), the purple disks represent Pi-Alkyl interactions (Hydrophobic), the dark pink represent Pi-Pi Stacked contacts (hydrophobic), the orange disc represents a Pi-Sulfur interaction, and finally, the lime green discs represent hydrogen bonds.

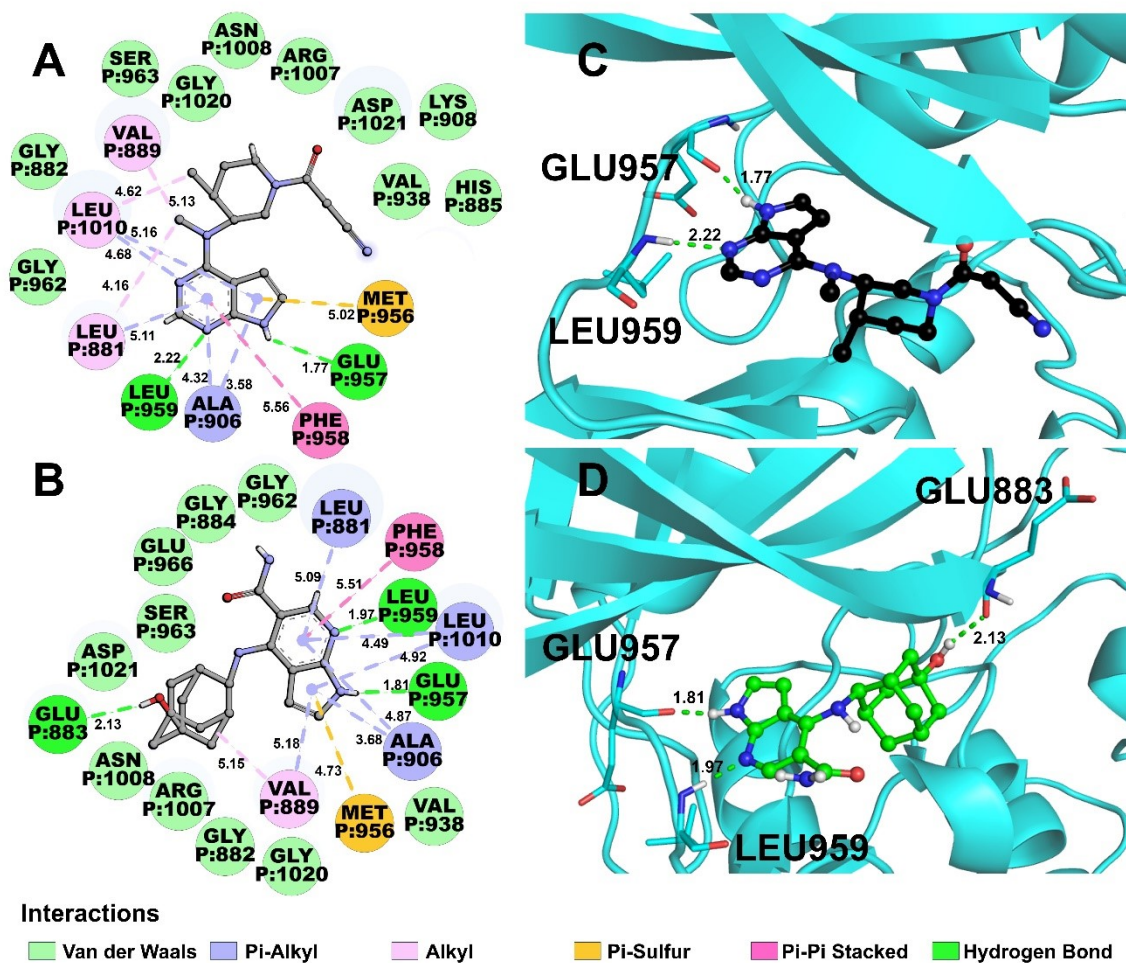

**Supplementary Figure 4.** Sum and convergence of energy based on final conformation provided by using CHARMM36 and TIP3P water model. The graph represents the interaction energy variation as a function of radius between ligand and JAK1 residues. Tofacitinib and Peficitinib with homogeneous constant are represented black and in lime green, respectively. Et represents the interaction energy sum.

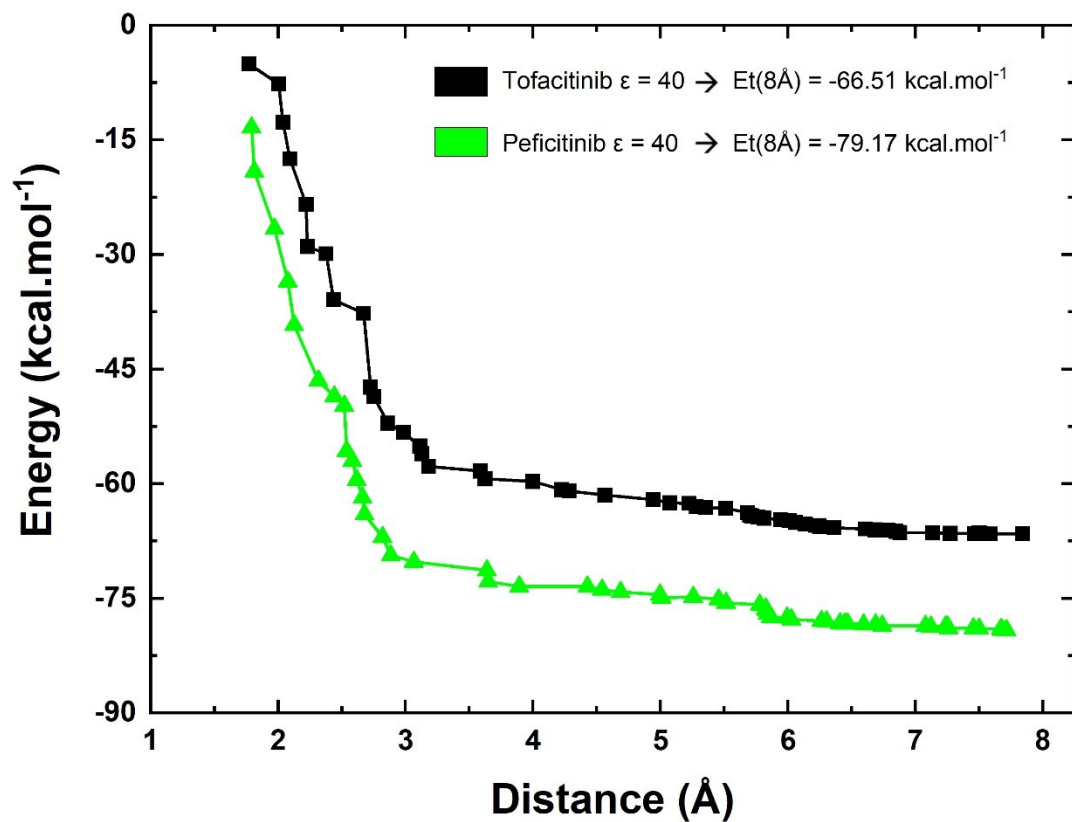

1 **Supplementary Table 1.** Quantum description of the interactions between JAK1 and  
 2 Tofacitinib using homogeneous dielectric function.

| <b>JAK1 Residue</b> | <b>Distance (Å)</b> | <b>Interaction Energy (kcal/mol)</b> | <b>JAK1 Residue Atom</b> | <b>Tofacitinib Atom</b> | <b>Tofacitinib Region</b> |
|---------------------|---------------------|--------------------------------------|--------------------------|-------------------------|---------------------------|
| GLU957              | 1.78                | -4.27                                | O                        | H20(N12)                | i                         |
| LEU959              | 2.10                | -7.59                                | HN                       | N17(C18)                | i                         |
| MET956              | 2.11                | -2.48                                | HB1                      | H18(C11)                | I                         |
| LEU1010             | 2.12                | -5.91                                | HD22                     | H8(C6)                  | iii                       |
| VAL889              | 2.18                | -5.63                                | HG22                     | H2(C2)                  | iii                       |
| SER963              | 2.23                | -1.52                                | HB2                      | H11(C7)                 | iii                       |
| LEU881              | 2.25                | -3.81                                | HB2                      | H15(C9)                 | ii                        |
| ASP1021             | 2.42                | -5.97                                | OD2                      | H10(C22)                | iv                        |
| PHE886              | 2.65                | -3.34                                | HN                       | N24(C23)                | iv                        |
| GLY884              | 2.84                | -2.39                                | HA2                      | N24(C23)                | iv                        |
| PHE958              | 2.90                | -8.51                                | HA                       | N17(C18)                | i                         |
| VAL938              | 2.93                | -1.66                                | HG22                     | H18(C11)                | i                         |
| GLY1020             | 2.98                | -1.47                                | O                        | H6(C5)                  | iii                       |
| ALA906              | 3.02                | -2.85                                | HB1                      | H20(N12)                | i                         |
| LYS908              | 3.06                | -2.69                                | HE1                      | N24(C23)                | iv                        |
| ARG1007             | 3.16                | -1.02                                | O                        | H7(C5)                  | iii                       |
| ASN1008             | 3.20                | -1.25                                | HA                       | H7(C5)                  | iii                       |
| GLY962              | 3.31                | -1.21                                | HA1                      | H19(C18)                | i                         |
| GLY887              | 3.61                | 1.14                                 | O                        | N24(C23)                | iv                        |
| HIS885              | 3.74                | -2.70                                | HN                       | N24(C23)                | iv                        |
| PRO960              | 4.33                | -0.48                                | HA                       | H19(C18)                | i                         |
| GLY1023             | 5.01                | -0.10                                | HN                       | H10(C22)                | iv                        |
| PHE1022             | 5.11                | -0.51                                | HN                       | H10(C22)                | iv                        |
| GLY882              | 5.12                | -0.25                                | O                        | H16(C9)                 | ii                        |
| VAL1009             | 5.19                | -0.48                                | N                        | H7(C5)                  | iii                       |
| SER961              | 5.20                | -0.07                                | N                        | H19(C18)                | i                         |
| LYS888              | 5.33                | -0.30                                | C                        | O21(C20)                | iv                        |
| LEU929              | 5.54                | -0.11                                | HD13                     | H18(C11)                | i                         |
| GLU883              | 5.61                | -1.76                                | C                        | N24(C23)                | iv                        |
| LEU954              | 5.65                | -0.19                                | HG                       | H18(C11)                | i                         |
| LEU964              | 5.76                | -0.12                                | HN                       | H11(C7)                 | iii                       |
| LYS939              | 5.77                | -0.24                                | O                        | H18(C11)                | i                         |
| LEU891              | 5.87                | -0.21                                | HD11                     | H19(C18)                | i                         |
| ALA1006             | 5.89                | -0.10                                | O                        | H11(C7)                 | iii                       |
| LYS965              | 6.01                | -0.11                                | HB2                      | H11(C7)                 | iii                       |
| GLU925              | 6.04                | -0.12                                | OE2                      | N24(C23)                | iv                        |
| VAL1011             | 6.04                | -0.24                                | HN                       | H19(C18)                | i                         |
| ILE955              | 6.14                | 0.00                                 | C                        | H18(C11)                | i                         |
| VAL907              | 6.14                | -0.25                                | N                        | H18(C11)                | i                         |

|         |      |       |      |          |     |
|---------|------|-------|------|----------|-----|
| LYS1018 | 6.39 | -0.15 | HD2  | H20(N12) | i   |
| GLU966  | 6.42 | -0.09 | HG2  | H12(C7)  | iii |
| VAL905  | 6.45 | -0.10 | HA   | H20(N12) | i   |
| ILE1019 | 6.57 | -0.13 | HG22 | H7(C5)   | iii |
| GLU890  | 6.64 | -0.14 | N    | H16(C9)  | ii  |
| TYR940  | 6.64 | -0.06 | HA   | H18(C11) | i   |
| SER909  | 6.75 | -0.16 | HN   | O21(C20) | iv  |
| ASP880  | 6.76 | 0.08  | C    | H15(C9)  | ii  |
| LYS941  | 6.84 | -0.07 | HG1  | H18(C11) | i   |
| GLU1012 | 7.06 | 0.00  | HA   | H19(C18) | i   |
| ASP1003 | 7.12 | -0.15 | OD2  | H10(C22) | iv  |
| LEU1024 | 7.16 | -0.03 | HN   | H10(C22) | iv  |
| ARG879  | 7.44 | -0.23 | HH21 | H15(C9)  | ii  |
| LYS911  | 7.48 | -0.32 | HB1  | N24(C23) | iv  |
| ALA1005 | 7.57 | -0.04 | O    | H7(C5)   | iii |
| LEU910  | 7.69 | -0.01 | HA   | N24(C23) | iv  |
| HIS1001 | 7.80 | -0.05 | HE1  | H7(C5)   | iii |

3

4

5 **Supplementary Table 2.** Quantum description of the interactions between JAK1 and  
6 Tofacitinib using inhomogeneous dielectric function.

| JAK1 Residue | Distance (Å) | Dielectric Constant | Interaction Energy (kcal/mol) | JAK1 Residue Atom | Tofacitinib Atom | Tofacitinib Region |
|--------------|--------------|---------------------|-------------------------------|-------------------|------------------|--------------------|
| GLU957       | 1.78         | 23.60               | -4.46                         | O                 | H20(N12)         | i                  |
| LEU959       | 2.10         | 27.14               | -7.64                         | HN                | N17(C18)         | i                  |
| MET956       | 2.11         | 24.44               | -2.44                         | HB1               | H18(C11)         | i                  |
| LEU1010      | 2.12         | 24.85               | -5.95                         | HD22              | H8(C6)           | iii                |
| VAL889       | 2.18         | 26.41               | -5.62                         | HG22              | H2(C2)           | iii                |
| SER963       | 2.23         | 30.72               | -1.51                         | HB2               | H11(C7)          | iii                |
| LEU881       | 2.25         | 29.90               | -3.83                         | HB2               | H15(C9)          | ii                 |
| ASP1021      | 2.42         | 30.48               | -6.15                         | OD2               | H10(C22)         | iv                 |
| PHE886       | 2.65         | 33.29               | -3.35                         | HN                | N24(C23)         | iv                 |
| GLY884       | 2.84         | 40.33               | -2.39                         | HA2               | N24(C23)         | iv                 |
| PHE958       | 2.90         | 28.34               | -8.56                         | HA                | N17(C18)         | i                  |
| VAL938       | 2.93         | 30.03               | -1.65                         | HG22              | H18(C11)         | i                  |
| GLY1020      | 2.98         | 29.07               | -1.48                         | O                 | H6(C5)           | iii                |
| ALA906       | 3.02         | 26.31               | -2.88                         | HB1               | H20(N12)         | i                  |
| LYS908       | 3.06         | 33.97               | -2.77                         | HE1               | N24(C23)         | iv                 |
| ARG1007      | 3.16         | 39.66               | -1.02                         | O                 | H7(C5)           | iii                |
| ASN1008      | 3.20         | 30.28               | -1.28                         | HA                | H7(C5)           | iii                |
| GLY962       | 3.31         | 34.03               | -1.22                         | HA1               | H19(C18)         | i                  |
| GLY887       | 3.61         | 34.78               | 1.16                          | O                 | N24(C23)         | iv                 |

|         |      |       |       |      |          |     |
|---------|------|-------|-------|------|----------|-----|
| HIS885  | 3.74 | 38.76 | -2.70 | HN   | N24(C23) | iv  |
| PRO960  | 4.33 | 33.55 | -0.49 | HA   | H19(C18) | i   |
| GLY1023 | 5.01 | 36.80 | -0.10 | HN   | H10(C22) | iv  |
| PHE1022 | 5.11 | 28.84 | -0.51 | HN   | H10(C22) | iv  |
| GLY882  | 5.12 | 42.72 | -0.25 | O    | H16(C9)  | ii  |
| VAL1009 | 5.19 | 24.01 | -0.49 | N    | H7(C5)   | iii |
| SER961  | 5.20 | 34.97 | -0.08 | N    | H19(C18) | i   |
| LYS888  | 5.33 | 29.47 | -0.31 | C    | O21(C20) | iv  |
| LEU929  | 5.54 | 35.08 | -0.11 | HD13 | H18(C11) | i   |
| GLU883  | 5.61 | 44.91 | -1.75 | C    | N24(C23) | iv  |
| LEU954  | 5.65 | 27.96 | -0.19 | HG   | H18(C11) | i   |
| LEU964  | 5.76 | 27.28 | -0.11 | HN   | H11(C7)  | iii |
| LYS939  | 5.77 | 26.61 | -0.25 | O    | H18(C11) | i   |
| LEU891  | 5.87 | 28.36 | -0.21 | HD11 | H19(C18) | i   |
| ALA1006 | 5.89 | 29.72 | -0.10 | O    | H11(C7)  | iii |
| LYS965  | 6.01 | 40.53 | -0.11 | HB2  | H11(C7)  | iii |
| GLU925  | 6.04 | 38.41 | -0.11 | OE2  | N24(C23) | iv  |
| VAL1011 | 6.04 | 30.70 | -0.24 | HN   | H19(C18) | i   |
| ILE955  | 6.14 | 25.98 | 0.01  | C    | H18(C11) | i   |
| VAL907  | 6.14 | 26.09 | -0.24 | N    | H18(C11) | i   |
| LYS1018 | 6.39 | 25.56 | -0.11 | HD2  | H20(N12) | i   |
| GLU966  | 6.42 | 44.60 | -0.09 | HG2  | H12(C7)  | iii |
| VAL905  | 6.45 | 23.81 | -0.07 | HA   | H20(N12) | i   |
| ILE1019 | 6.57 | 25.94 | -0.12 | HG22 | H7(C5)   | iii |
| GLU890  | 6.64 | 21.68 | -0.05 | N    | H16(C9)  | ii  |
| TYR940  | 6.64 | 23.44 | -0.06 | HA   | H18(C11) | i   |
| SER909  | 6.75 | 26.37 | -0.13 | HN   | O21(C20) | iv  |
| ASP880  | 6.76 | 32.12 | 0.09  | C    | H15(C9)  | ii  |
| LYS941  | 6.84 | 25.33 | -0.03 | HG1  | H18(C11) | i   |
| GLU1012 | 7.06 | 28.85 | -0.01 | HA   | H19(C18) | i   |
| ASP1003 | 7.12 | 33.44 | -0.18 | OD2  | H10(C22) | iv  |
| LEU1024 | 7.16 | 35.03 | -0.03 | HN   | H10(C22) | iv  |
| ARG879  | 7.44 | 31.64 | -0.24 | HH21 | H15(C9)  | ii  |
| LYS911  | 7.48 | 36.01 | -0.34 | HB1  | N24(C23) | iv  |
| ALA1005 | 7.57 | 29.87 | -0.05 | O    | H7(C5)   | iii |
| LEU910  | 7.69 | 27.74 | 0.01  | HA   | N24(C23) | iv  |
| HIS1001 | 7.80 | 25.74 | -0.06 | HE1  | H7(C5)   | iii |

---

7

8

9

10

11

12 **Supplementary Table 3.** Quantum description of the interactions between JAK1 and  
 13 Peficitinib using homogeneous dielectric function.

| JAK1 Residue | Distance (Å) | Interaction Energy (kcal/mol) | JAK1 Residue Atom | Peficitinib Atom | Peficitinib Region |
|--------------|--------------|-------------------------------|-------------------|------------------|--------------------|
| LEU959       | 1.83         | -11.58                        | O                 | H20(N12)         | Iv                 |
| GLU957       | 1.94         | -4.57                         | O                 | H18(N7)          | I                  |
| VAL889       | 2.17         | -4.47                         | HG23              | H13(C16)         | Iii                |
| LEU1010      | 2.22         | -6.61                         | HD13              | H17(C18)         | Iii                |
| PHE958       | 2.38         | -13.44                        | HD1               | H2(C3)           | I                  |
| GLY962       | 2.48         | -0.80                         | HN                | H19(N12)         | Iv                 |
| LEU881       | 2.52         | -8.08                         | HB2               | H6(C23)          | Iii                |
| VAL938       | 2.57         | -1.24                         | HG21              | H3(C8)           | I                  |
| GLY884       | 2.62         | -3.19                         | HA2               | O24(H22)         | Iii                |
| ASP1021      | 2.73         | -4.25                         | HB1               | H11(C15)         | Iii                |
| MET956       | 2.75         | -1.87                         | SD                | H3(C8)           | I                  |
| GLY882       | 3.12         | -1.27                         | HA2               | H14(C21)         | Iii                |
| GLU883       | 3.16         | -2.48                         | C                 | H8(C22)          | Iii                |
| PRO960       | 3.32         | -2.46                         | HA                | H20(N12)         | Iv                 |
| ALA906       | 3.42         | -1.62                         | HB3               | H18(N7)          | I                  |
| GLY1020      | 3.44         | -1.21                         | O                 | H1(C9)           | I                  |
| SER961       | 3.85         | 1.90                          | N                 | H20(N12)         | Iv                 |
| LYS908       | 3.89         | -2.11                         | HZ2               | H13(C16)         | Iii                |
| HIS885       | 4.25         | -0.35                         | HN                | H22(O24)         | Iii                |
| SER963       | 4.61         | -0.56                         | HB1               | H15(C14)         | Iii                |
| ARG879       | 4.62         | -0.57                         | HH12              | H19(N12)         | Iv                 |
| LEU891       | 4.74         | -0.40                         | HD11              | H2(C3)           | I                  |
| ARG1007      | 5.02         | -0.92                         | O                 | H15(C14)         | Iii                |
| ASN1008      | 5.06         | -0.52                         | HA                | H11(C15)         | Iii                |
| PHE1022      | 5.08         | -0.50                         | HE1               | H3(C8)           | I                  |
| GLY887       | 5.12         | -0.18                         | O                 | H8(C22)          | Iii                |
| VAL1011      | 5.23         | -0.36                         | O                 | H20(N12)         | Iv                 |
| LYS888       | 5.40         | -0.48                         | HA                | H8(C22)          | Iii                |
| LEU929       | 5.65         | -0.08                         | HD11              | H3(C8)           | I                  |
| LYS939       | 6.15         | -0.13                         | HN                | H18(N7)          | I                  |
| GLU890       | 6.19         | -0.23                         | N                 | H7(C23)          | Iii                |
| ILE1019      | 6.22         | -0.18                         | O                 | H3(C8)           | I                  |
| ASP880       | 6.43         | -0.07                         | C                 | H6(C23)          | Iii                |
| GLU925       | 6.45         | 0.05                          | OE1               | H12(C16)         | Iii                |
| VAL905       | 6.54         | -0.13                         | HA                | H18(N7)          | I                  |
| VAL1009      | 6.55         | -0.32                         | O                 | H15(C14)         | Iii                |
| GLY1023      | 6.55         | -0.06                         | HA2               | H22(O24)         | Iii                |
| GLU1012      | 6.60         | -0.08                         | HA                | H20(N12)         | Iv                 |
| LYS1018      | 6.96         | -0.10                         | HD2               | H18(N7)          | I                  |



|         |      |       |      |          |     |
|---------|------|-------|------|----------|-----|
| ASP1003 | 7.08 | -0.23 | OD2  | H22(O24) | lii |
| GLU966  | 7.13 | -0.11 | OE1  | H5(C19)  | lii |
| LEU954  | 7.15 | -0.06 | HD23 | H3(C8)   | I   |
| VAL907  | 7.25 | -0.16 | N    | N7(H18)  | I   |
| LYS941  | 7.41 | -0.04 | HG1  | H18(N7)  | I   |
| LEU964  | 7.45 | -0.05 | HN   | H15(C14) | lii |
| ILE955  | 7.73 | -0.06 | C    | H18(N7)  | I   |
| TYR940  | 7.77 | -0.03 | HA   | H3(C8)   | I   |
| ILE937  | 7.81 | 0.00  | HG23 | H3(C8)   | I   |
| GLN904  | 7.83 | -0.05 | HB2  | H2(C3)   | I   |
| PHE886  | 7.94 | -0.08 | N    | O24(H22) | lii |
| CYS892  | 7.98 | -0.03 | HN   | H2(C3)   | I   |

14

15

16

17 **Supplementary Table 4.** Quantum description of the interactions between JAK1 and  
18 Peficitinib using inhomogeneous dielectric function.

| JAK1 Residue | Distance (Å) | Dielectric Function | Interaction Energy (kcal/mol) | JAK1 Residue Atom | Peficitinib Atom | Peficitinib Region |
|--------------|--------------|---------------------|-------------------------------|-------------------|------------------|--------------------|
| LEU959       | 1.83         | 24.49               | -11.71                        | O                 | H20(N12)         | iv                 |
| GLU957       | 1.94         | 22.10               | -4.80                         | O                 | H18(N7)          | i                  |
| VAL889       | 2.17         | 26.29               | -4.48                         | HG23              | H13(C16)         | iii                |
| LEU1010      | 2.22         | 26.13               | -6.62                         | HD13              | H17(C18)         | iii                |
| PHE958       | 2.38         | 24.01               | -13.49                        | HD1               | H2(C3)           | i                  |
| GLY962       | 2.48         | 35.69               | -0.81                         | HN                | H19(N12)         | iv                 |
| LEU881       | 2.52         | 29.75               | -8.06                         | HB2               | H6(C23)          | iii                |
| VAL938       | 2.57         | 25.23               | -1.25                         | HG21              | H3(C8)           | i                  |
| GLY884       | 2.62         | 31.52               | -3.18                         | HA2               | O24(H22)         | iii                |
| ASP1021      | 2.73         | 34.19               | -4.30                         | HB1               | H11(C15)         | iii                |
| MET956       | 2.75         | 27.77               | -1.87                         | SD                | H3(C8)           | i                  |
| GLY882       | 3.12         | 31.44               | -1.26                         | HA2               | H14(C21)         | iii                |
| GLU883       | 3.16         | 35.65               | -2.48                         | C                 | H8(C22)          | iii                |
| PRO960       | 3.32         | 28.61               | -2.46                         | HA                | H20(N12)         | iv                 |
| ALA906       | 3.42         | 29.25               | -1.63                         | HB3               | H18(N7)          | i                  |
| GLY1020      | 3.44         | 30.47               | -1.22                         | O                 | H1(C9)           | i                  |
| SER961       | 3.85         | 34.27               | 1.89                          | N                 | H20(N12)         | iv                 |
| LYS908       | 3.89         | 30.94               | -2.18                         | HZ2               | H13(C16)         | iii                |
| HIS885       | 4.25         | 38.92               | -0.35                         | HN                | H22(O24)         | iii                |
| SER963       | 4.61         | 37.18               | -0.56                         | HB1               | H15(C14)         | iii                |
| ARG879       | 4.62         | 31.13               | -0.60                         | HH12              | H19(N12)         | iv                 |
| LEU891       | 4.74         | 24.54               | -0.40                         | HD11              | H2(C3)           | i                  |

|         |      |       |       |      |          |     |
|---------|------|-------|-------|------|----------|-----|
| ARG1007 | 5.02 | 47.90 | -0.92 | O    | H15(C14) | iii |
| ASN1008 | 5.06 | 38.01 | -0.52 | HA   | H11(C15) | iii |
| PHE1022 | 5.08 | 32.26 | -0.50 | HE1  | H3(C8)   | i   |
| GLY887  | 5.12 | 33.28 | -0.18 | O    | H8(C22)  | iii |
| VAL1011 | 5.23 | 31.61 | -0.36 | O    | H20(N12) | iv  |
| LYS888  | 5.40 | 29.81 | -0.49 | HA   | H8(C22)  | iii |
| LEU929  | 5.65 | 33.18 | -0.09 | HD11 | H3(C8)   | i   |
| LYS939  | 6.15 | 24.72 | -0.12 | HN   | H18(N7)  | i   |
| GLU890  | 6.19 | 23.51 | -0.20 | N    | H7(C23)  | iii |
| ILE1019 | 6.22 | 29.58 | -0.18 | O    | H3(C8)   | i   |
| ASP880  | 6.43 | 27.96 | -0.05 | C    | H6(C23)  | iii |
| GLU925  | 6.45 | 37.62 | 0.05  | OE1  | H12(C16) | iii |
| VAL905  | 6.54 | 24.17 | -0.12 | HA   | H18(N7)  | i   |
| VAL1009 | 6.55 | 24.93 | -0.32 | O    | H15(C14) | iii |
| GLY1023 | 6.55 | 39.57 | -0.06 | HA2  | H22(O24) | iii |
| GLU1012 | 6.60 | 27.01 | -0.10 | HA   | H20(N12) | iv  |
| LYS1018 | 6.96 | 25.13 | -0.07 | HD2  | H18(N7)  | i   |
| ASP1003 | 7.08 | 34.26 | -0.24 | OD2  | H22(O24) | iii |
| GLU966  | 7.13 | 46.78 | -0.11 | OE1  | H5(C19)  | iii |
| LEU954  | 7.15 | 25.75 | -0.05 | HD23 | H3(C8)   | i   |
| VAL907  | 7.25 | 24.31 | -0.15 | N    | N7(H18)  | i   |
| LYS941  | 7.41 | 25.56 | -0.03 | HG1  | H18(N7)  | i   |
| LEU964  | 7.45 | 25.21 | -0.05 | HN   | H15(C14) | iii |
| ILE955  | 7.73 | 25.49 | -0.05 | C    | H18(N7)  | i   |
| TYR940  | 7.77 | 26.17 | -0.03 | HA   | H3(C8)   | i   |
| ILE937  | 7.81 | 24.36 | 0.00  | HG23 | H3(C8)   | i   |
| GLN904  | 7.83 | 28.18 | -0.06 | HB2  | H2(C3)   | i   |
| PHE886  | 7.94 | 38.65 | -0.08 | N    | O24(H22) | iii |
| CYS892  | 7.98 | 26.23 | -0.03 | HN   | H2(C3)   | i   |

---

19

20

21

22

23

24

25

26

27

28

29 **Supplementary Table 5.** The relation between the types of interactions of amino acid  
 30 residues of JAK1 using homogeneous dielectric function with tofacitinib and their associated  
 31 energies.

32

| <b>Interaction type</b>             | <b>JAK1 residue</b> | <b>Interaction energy (kcal.mol<sup>-1</sup>)</b> | <b>Interaction energy sum (kcal.mol<sup>-1</sup>)</b> |
|-------------------------------------|---------------------|---------------------------------------------------|-------------------------------------------------------|
| Van der Waals                       | LEU <sup>881</sup>  | -3.81                                             | -28.67                                                |
|                                     | HIS <sup>885</sup>  | -2.70                                             |                                                       |
|                                     | GLY <sup>887</sup>  | 1.14                                              |                                                       |
|                                     | VAL <sup>889</sup>  | -5.63                                             |                                                       |
|                                     | LYS <sup>908</sup>  | -2.69                                             |                                                       |
|                                     | PHE <sup>958</sup>  | -8.51                                             |                                                       |
|                                     | GLY <sup>962</sup>  | -1.21                                             |                                                       |
|                                     | SER <sup>963</sup>  | -1.52                                             |                                                       |
|                                     | ARG <sup>1007</sup> | -1.02                                             |                                                       |
|                                     | ASN <sup>1008</sup> | -1.25                                             |                                                       |
|                                     | GLY <sup>1020</sup> | -1.47                                             |                                                       |
| Hydrogen bonds                      | GLU <sup>957</sup>  | -4.27                                             | -11.86                                                |
|                                     | LEU <sup>959</sup>  | -7.59                                             |                                                       |
| Hydrophobic<br>(Alkyl and Pi-Alkyl) | ALA <sup>906</sup>  | -2.85                                             | -4.51                                                 |
|                                     | VAL <sup>938</sup>  | -1.66                                             |                                                       |
| $\pi$ -Sulfur                       | MET <sup>956</sup>  | -2.48                                             | -2.48                                                 |

33

34

35

36

37

38

39

40

41

42 **Supplementary Table 6.** The relation between the types of interactions of the amino acid  
 43 residue of JAK1 using inhomogeneous dielectric function with tofacitinib and their  
 44 associated energies.

45

| <b>Interaction type</b>             | <b>JAK1 residue</b> | <b>Interaction energy (kcal.mol<sup>-1</sup>)</b> | <b>Interaction energy sum (kcal.mol<sup>-1</sup>)</b> |
|-------------------------------------|---------------------|---------------------------------------------------|-------------------------------------------------------|
| Van der Waals                       | LEU <sup>881</sup>  | -3.83                                             | -28.83                                                |
|                                     | HIS <sup>885</sup>  | -2.70                                             |                                                       |
|                                     | GLY <sup>887</sup>  | 1.16                                              |                                                       |
|                                     | VAL <sup>889</sup>  | -5.62                                             |                                                       |
|                                     | LYS <sup>908</sup>  | -2.77                                             |                                                       |
|                                     | PHE <sup>958</sup>  | -8.56                                             |                                                       |
|                                     | GLY <sup>962</sup>  | -1.22                                             |                                                       |
|                                     | SER <sup>963</sup>  | -1.51                                             |                                                       |
|                                     | ARG <sup>1007</sup> | -1.02                                             |                                                       |
|                                     | ASN <sup>1008</sup> | -1.28                                             |                                                       |
|                                     | GLY <sup>1020</sup> | -1.48                                             |                                                       |
| Hydrogen bonds                      | GLU <sup>957</sup>  | -4.46                                             | -12.10                                                |
|                                     | LEU <sup>959</sup>  | -7.64                                             |                                                       |
| Hydrophobic<br>(Alkyl and Pi-Alkyl) | ALA <sup>906</sup>  | -2.88                                             | -4.53                                                 |
|                                     | VAL <sup>938</sup>  | -1.65                                             |                                                       |
| $\pi$ -Sulfur                       | MET <sup>956</sup>  | -2.44                                             | -2.44                                                 |

46

47

48

49

50

51

52

53

54 **Supplementary Table 7.** The relation between the types of interactions of amino acid  
 55 residues of JAK1 with peficitinib and their associated energies considering homogeneous  
 56 dielectric function.

57

| <b>Interaction type</b>             | <b>JAK1 residue</b> | <b>Interaction energy (kcal.mol<sup>-1</sup>)</b> | <b>Interaction energy sum (kcal.mol<sup>-1</sup>)</b> |
|-------------------------------------|---------------------|---------------------------------------------------|-------------------------------------------------------|
| Van der Waals                       | GLY <sup>882</sup>  | -1.27                                             | -30.55                                                |
|                                     | GLU <sup>883</sup>  | -2.48                                             |                                                       |
|                                     | GLY <sup>884</sup>  | -3.19                                             |                                                       |
|                                     | LYS <sup>908</sup>  | -2.11                                             |                                                       |
|                                     | VAL <sup>938</sup>  | -1.24                                             |                                                       |
|                                     | PHE <sup>958</sup>  | -13.44                                            |                                                       |
|                                     | PRO <sup>960</sup>  | -2.46                                             |                                                       |
|                                     | SER <sup>961</sup>  | 1.90                                              |                                                       |
|                                     | GLY <sup>962</sup>  | -0.80                                             |                                                       |
|                                     | GLY <sup>1020</sup> | -1.21                                             |                                                       |
|                                     | ASP <sup>1021</sup> | -4.25                                             |                                                       |
| Hydrogen bonds                      | GLU <sup>957</sup>  | -4.57                                             | -16.15                                                |
|                                     | LEU <sup>959</sup>  | -11.58                                            |                                                       |
| Hydrophobic<br>(Alkyl and Pi-Alkyl) | ALA <sup>906</sup>  | -1.62                                             | -10.10                                                |
|                                     | MET <sup>956</sup>  | -1.87                                             |                                                       |
|                                     | LEU <sup>1010</sup> | -6.61                                             |                                                       |

58

59

60

61

62

63

64

65 **Supplementary Table 8.** The relation between the types of interactions of amino acid  
 66 residues of JAK1 with peficitinib and their associated energies considering inhomogeneous  
 67 dielectric function.

| <b>Interaction type</b>             | <b>JAK1 residue</b> | <b>Interaction energy (kcal.mol<sup>-1</sup>)</b> | <b>Interaction energy sum (kcal.mol<sup>-1</sup>)</b> |
|-------------------------------------|---------------------|---------------------------------------------------|-------------------------------------------------------|
| Van der Waals                       | GLY <sup>882</sup>  | -1.26                                             | -30.74                                                |
|                                     | GLU <sup>883</sup>  | -2.48                                             |                                                       |
|                                     | GLY <sup>884</sup>  | -3.18                                             |                                                       |
|                                     | LYS <sup>908</sup>  | -2.18                                             |                                                       |
|                                     | VAL <sup>938</sup>  | -1.25                                             |                                                       |
|                                     | PHE <sup>958</sup>  | -13.49                                            |                                                       |
|                                     | PRO <sup>960</sup>  | -2.46                                             |                                                       |
|                                     | SER <sup>961</sup>  | 1.89                                              |                                                       |
|                                     | GLY <sup>962</sup>  | -0.81                                             |                                                       |
|                                     | GLY <sup>1020</sup> | -1.22                                             |                                                       |
|                                     | ASP <sup>1021</sup> | -4.30                                             |                                                       |
| Hydrogen bonds                      | GLU <sup>957</sup>  | -4.80                                             | -16.51                                                |
|                                     | LEU <sup>959</sup>  | -11.71                                            |                                                       |
| Hydrophobic<br>(Alkyl and Pi-Alkyl) | ALA <sup>906</sup>  | -1.63                                             | -10.12                                                |
|                                     | MET <sup>956</sup>  | -1.87                                             |                                                       |
|                                     | LEU <sup>1010</sup> | -6.62                                             |                                                       |

68

69

70

71

72

73

74

75

76

77

78 **Supplementary Table 9.** Quantum description of the surface interactions (conformation  
 79 obtained by using CHARMM36 and TIP3P) between JAK1 and Tofacitinib using  
 80 homogeneous dielectric function (40).

81

| JAK1 Residue | Distance (Å) | Interaction Energy (kcal/mol) | JAK1 Residue Atom | Tofacitinib Atom | Tofacitinib Region |
|--------------|--------------|-------------------------------|-------------------|------------------|--------------------|
| GLU957       | 1.77         | -5.05                         | O                 | H20(N12)         | I                  |
| MET956       | 2.00         | -2.60                         | HB2               | H18(C11)         | I                  |
| LEU881       | 2.04         | -5.01                         | HD13              | H16(C9)          | II                 |
| VAL889       | 2.09         | -4.78                         | HG12              | H2(C2)           | III                |
| LEU959       | 2.22         | -6.00                         | HN                | N17(C18)         | I                  |
| LEU1010      | 2.23         | -5.50                         | HD22              | H13(C7)          | II                 |
| SER963       | 2.38         | -0.94                         | HB1               | H13(C7)          | III                |
| ASP1021      | 2.43         | -6.02                         | HB1               | H9(C22)          | IV                 |
| GLY884       | 2.67         | -1.78                         | HA1               | N24(C23)         | IV                 |
| PHE958       | 2.73         | -9.69                         | HE1               | H19(C18)         | I                  |
| VAL938       | 2.75         | -1.23                         | HG12              | H18(C11)         | I                  |
| ALA906       | 2.86         | -3.46                         | HB3               | H20(N12)         | I                  |
| ASN1008      | 2.98         | -1.23                         | HÁ                | H7(C5)           | III                |
| GLY1020      | 3.11         | -1.75                         | O                 | H6(C5)           | III                |
| GLY882       | 3.13         | -1.03                         | HA1               | H14(C9)          | II                 |
| ARG1007      | 3.18         | -1.67                         | O                 | H7(C5)           | III                |
| LYS908       | 3.59         | -0.59                         | HZ3               | H10(C22)         | IV                 |
| HIS885       | 3.62         | -1.03                         | HN                | N24(C23)         | IV                 |
| GLY962       | 4.00         | -0.35                         | HA2               | H19(C18)         | I                  |
| GLU883       | 4.22         | -1.07                         | O                 | N24(C23)         | IV                 |
| PRO960       | 4.28         | -0.16                         | HÁ                | H19(C18)         | I                  |
| PHE886       | 4.56         | -0.54                         | HD2               | H10(C22)         | IV                 |
| VAL1009      | 4.94         | -0.60                         | N                 | H7(C5)           | III                |
| GLU925       | 5.07         | -0.40                         | OE1               | H10(C22)         | IV                 |
| GLY1023      | 5.22         | -0.08                         | HN                | H9(C22)          | IV                 |
| PHE1022      | 5.28         | -0.44                         | HN                | H9(C22)          | IV                 |
| GLY887       | 5.35         | -0.11                         | O                 | O21(C20)         | IV                 |
| LEU929       | 5.51         | -0.08                         | HD12              | H18(C11)         | I                  |
| LYS888       | 5.68         | -0.57                         | C                 | O21(C20)         | IV                 |
| GLU966       | 5.70         | -0.37                         | OE1               | H12(C7)          | III                |
| SER961       | 5.72         | -0.07                         | N                 | H19(C18)         | I                  |
| LEU964       | 5.77         | -0.12                         | HN                | H13(C7)          | III                |
| VAL905       | 5.81         | -0.18                         | HA                | H20(N12)         | I                  |
| LYS939       | 5.94         | -0.20                         | O                 | H18(C11)         | I                  |
| ALA1006      | 6.01         | -0.12                         | O                 | H13(C7)          | III                |
| VAL907       | 6.06         | -0.26                         | N                 | C11(H18)         | I                  |

|         |      |       |      |          |     |
|---------|------|-------|------|----------|-----|
| LEU891  | 6.14 | -0.19 | HD12 | H19(C18) | i   |
| LYS965  | 6.22 | -0.18 | HB2  | H13(C7)  | iii |
| ILE955  | 6.24 | 0.01  | C    | H18(C11) | i   |
| ARG879  | 6.25 | -0.21 | HH11 | H16(C9)  | ii  |
| LEU954  | 6.36 | -0.10 | HG   | H18(C11) | i   |
| LYS1018 | 6.61 | -0.14 | HD1  | H20(N12) | i   |
| VAL1011 | 6.69 | -0.14 | HN   | H19(C18) | i   |
| LYS941  | 6.79 | -0.05 | HG1  | H20(N12) | i   |
| ILE1019 | 6.85 | -0.15 | HA   | H7(C5)   | iii |
| GLU890  | 6.88 | -0.15 | HA   | H14(C9)  | ii  |
| LEU1024 | 7.13 | -0.05 | HN   | H9(C22)  | iv  |
| SER909  | 7.27 | -0.06 | HN   | O21(C20) | iv  |
| TYR940  | 7.46 | -0.03 | HA   | H18(C11) | i   |
| ASP880  | 7.50 | 0.08  | C    | H14(C9)  | ii  |
| GLN904  | 7.52 | -0.07 | O    | H20(N12) | i   |
| ALA1005 | 7.59 | -0.05 | O    | H7(C5)   | iii |
| ASP1003 | 7.84 | 0.04  | OD2  | N24(C23) | iv  |

---

82

83

84

85

86

87

88

89

90

91

92

93

94

95

96

97

98



99 **Supplementary Table 10.** Quantum description of the surface interactions (conformation  
 100 obtained by using CHARMM36 and TIP3P) between JAK1 and Peficitinib using  
 101 homogeneous dielectric function (40).

102

| JAK1 Residue | Distance (Å) | Interaction Energy (kcal/mol) | JAK1 Residue Atom | Peficitinib Atom | Peficitinib Region |
|--------------|--------------|-------------------------------|-------------------|------------------|--------------------|
| PHE958       | 1.79         | -13.36                        | HE1               | H20(N12)         | iv                 |
| GLU957       | 1.81         | -5.79                         | O                 | H18(N7)          | i                  |
| LEU959       | 1.97         | -7.49                         | HN                | N4(C6)           | i                  |
| LEU1010      | 2.08         | -6.93                         | HD22              | H4(C19)          | iii                |
| GLU883       | 2.13         | -5.62                         | O                 | H22(O24)         | iii                |
| LEU881       | 2.32         | -7.30                         | HD23              | H19(N12)         | iv                 |
| GLY882       | 2.44         | -2.07                         | HA1               | H7(C23)          | iii                |
| MET956       | 2.52         | -1.22                         | HG1               | H3(C8)           | i                  |
| VAL889       | 2.54         | -5.91                         | HG11              | H1(C9)           | i                  |
| GLY962       | 2.58         | -1.32                         | HA2               | H2(C3)           | i                  |
| ALA906       | 2.62         | -2.46                         | HB2               | H3(C8)           | i                  |
| GLY884       | 2.66         | -2.33                         | HA2               | H22(O24)         | iii                |
| ASP1021      | 2.68         | -2.21                         | HB1               | H10(C15)         | iii                |
| SER963       | 2.82         | -2.95                         | HB2               | H15(C19)         | iii                |
| ARG1007      | 2.88         | -2.39                         | O                 | H4(C19)          | iii                |
| VAL938       | 3.07         | -0.85                         | HG22              | H18(N7)          | i                  |
| GLY1020      | 3.64         | -1.12                         | O                 | H15(C14)         | iii                |
| ASN1008      | 3.65         | -1.47                         | HA                | H10(C15)         | iii                |
| GLU966       | 3.89         | -0.68                         | OE1               | H14(C21)         | iii                |
| ARG879       | 4.43         | 0.03                          | HH22              | H19(N12)         | iv                 |
| PRO960       | 4.54         | -0.43                         | N                 | H2(C3)           | i                  |
| LYS888       | 4.69         | -0.28                         | HA                | H12(C16)         | iii                |
| HIS885       | 4.99         | -0.37                         | HN                | H22(O24)         | iii                |
| LYS908       | 5.01         | -0.42                         | HB1               | H3(C8)           | i                  |
| SER961       | 5.26         | 0.13                          | C                 | H2(C3)           | i                  |
| LEU891       | 5.46         | -0.33                         | HB1               | H20(N12)         | iv                 |
| VAL1009      | 5.51         | -0.44                         | O                 | H4(C19)          | iii                |
| VAL907       | 5.78         | -0.26                         | N                 | H3(C8)           | i                  |
| ASP880       | 5.83         | -0.46                         | C                 | H16(C17)         | iii                |
| LEU964       | 5.83         | -0.18                         | HN                | H4(C19)          | iii                |
| GLU890       | 5.84         | -0.50                         | HA                | H16(C17)         | iii                |
| LYS965       | 5.87         | -0.44                         | HB2               | H14(C21)         | iii                |
| GLY887       | 5.99         | -0.08                         | O                 | H22(O24)         | iii                |
| VAL1011      | 6.03         | -0.22                         | HN                | H2(C3)           | i                  |
| VAL905       | 6.26         | -0.20                         | HA                | H18(N7)          | i                  |
| ALA1006      | 6.30         | -0.07                         | O                 | H4(C19)          | iii                |

|         |      |       |      |          |     |
|---------|------|-------|------|----------|-----|
| PHE1022 | 6.41 | -0.25 | HN   | H11(C15) | iii |
| LEU929  | 6.44 | -0.03 | HD23 | H3(C8)   | i   |
| ASP1003 | 6.47 | 0.05  | OD1  | O24(H22) | iii |
| LYS939  | 6.59 | -0.14 | HN   | H18(N7)  | i   |
| ILE955  | 6.69 | -0.03 | HA   | H3(C8)   | i   |
| LYS1018 | 6.74 | -0.16 | HD1  | H18(N7)  | i   |
| LEU954  | 7.08 | -0.05 | HG   | H3(C8)   | i   |
| GLY1023 | 7.12 | -0.07 | HN   | H11(C15) | iii |
| GLU1012 | 7.24 | 0.02  | HA   | H2(C3)   | i   |
| ALA1005 | 7.25 | -0.05 | HB2  | H9(C22)  | iii |
| ILE1019 | 7.26 | -0.17 | C    | H15(C14) | iii |
| LYS941  | 7.46 | -0.01 | HG1  | H18(N7)  | i   |
| SER909  | 7.50 | -0.06 | HN   | H12(C16) | iii |
| HIS1001 | 7.67 | -0.03 | HE1  | H10(C15) | iii |
| TYR967  | 7.68 | -0.10 | HN   | H14(C21) | iii |
| GLN904  | 7.71 | -0.07 | OE1  | H20(N12) | iv  |

---
